# Supplementary material for: Convolutional Neural Network for Real‑Time Localization of Ganglionated Plexi from Bipolar Intracardiac Electrograms
Source: Research Square preprint supplement (doi:10.21203/rs.3.rs-7974349/v1), 2025-11-14
Supplement: Supplementary file 1 [file cfd14e9f47c29dc5b9046bc0.docx]

**Supplemental Figures**

**Supplemental Figure 1a.** **High-probability ganglionated-plexus (GP) map projected onto a right-atrial shell (probability threshold ≥ 0.70).**

All 9,063 mapping points from an independent right-atrial test case are shown on the patient-specific endocardial surface. Nodes are color-coded by CNN-predicted GP probability, but only values ≥ 0.70 are displayed (scale bar: dark blue = 0.70, red = 1.00). Among the 65 electrophysiologic ally confirmed GP sites, 33 (51 %) fall inside yellow–red regions meeting the ≥ 0.70 threshold. In total, 513 points exceed this cut-off, delineating autonomic “hot-spots” that follow known atrial fat-pad trajectories while preserving spatial continuity. Mesh areas without electrogram acquisition are rendered in white.

CNN, convolutional neural network; GP, ganglionated plexus.

**Supplemental Figure 1b** **Three-dimensional probability map of CNN-predicted ganglionated-plexus (GP) sites on the right-atrial endocardium (display range ≥ 0.50).**

All 9 063 mapping points from an independent right-atrial test case are projected onto the patient-specific atrial mesh. Nodes are color-coded by the network’s predicted GP probability, with the scale restricted to values ≥ 0.50 (bar, bottom: dark blue = 0.50; red = 1.00). Of the 65 electrophysiologic ally confirmed GP sites, 33 (51 %) lie within regions scoring ≥ 0.70, and 513 points in total exceed this higher-confidence cut-off, forming contiguous autonomic “hot-spots” that track the roof, posterior wall and left pulmonary-vein ridge. Points with probability < 0.50 are suppressed, accentuating spatial clusters of elevated likelihood, while white areas denote surface patches without electrogram acquisition.

CNN, convolutional neural network; GP, ganglionated plexus.

**Supplemental Figure 2a.** **Left-atrial probability map of CNN-predicted ganglionated-plexus (GP) sites, left-anterior-oblique (LAO) view; display threshold ≥ 0.70.**

The left-atrial endocardial surface is shown from an LAO perspective with 6,021 mapping points color-coded by predicted GP probability. Only nodes with probabilities ≥ 0.70 are displayed (scale bar: dark blue = 0.70; red = 1.00). Among these points, 128 were electrophysiologic ally confirmed GP sites; the network classified 421 nodes above the 0.70 cut-off, forming contiguous cyan–red “hot-spots” along the posterior wall, intercaval region and ridge adjacent to the right pulmonary veins. Points with probabilities < 0.70 are hidden to emphasize high-confidence predictions, and mesh regions without electrogram acquisition are rendered in white.

CNN, convolutional neural network; GP, ganglionated plexus; LAO, left anterior oblique.

**Supplemental Figure 2b.** **Left-atrial probability map of CNN-predicted ganglionated-plexus (GP) sites, left-anterior-oblique (LAO) view; display range ≥ 0.50.**

All 6 021 mapping points recorded during a single procedure are projected onto the patient-specific left-atrial endocardial shell and color-coded by the network-predicted probability of GP tissue (continuous scale bar: 0.50 = dark blue to 1.00 = red). Among the 128 electrophysiologic ally confirmed GP sites, 421 nodes surpass the high-confidence cut-off of ≥ 0.70 (cyan–red clusters), forming anatomically plausible autonomic “hot-spots” along the posterior wall, intercaval groove and inferior vestibule. Regions with probabilities < 0.50 are suppressed to accentuate the full gradient of model confidence above this threshold, and white areas denote atrial surface segments without electrogram acquisition. The map demonstrates how the classifier concentrates elevated probabilities in spatially contiguous regions that correspond to recognized fat-pad territories.

CNN, convolutional neural network; GP, ganglionated plexus; LAO, left anterior oblique.

**Supplemental Figure 3a.** **High-probability ganglionated-plexus (GP) prediction map—left-atrial postero-anterior view (display threshold ≥ 0.70).**

The left-atrial endocardial surface is shown with 6 021 mapped points color-coded by CNN-predicted GP probability; only nodes scoring ≥ 0.70 are rendered (scale bar: dark blue = 0.70, red = 1.00). Of the 128 electrophysiologic ally confirmed GP sites, the network labels 421 points above the 0.70 cut-off (cyan–red clusters), forming spatially coherent autonomic “hot-spots” along the posterior vestibule and inferior wall. Areas without electrogram acquisition are depicted in white, underscoring the classifier’s tendency to localize high-confidence predictions to anatomically plausible fat-pad territories while suppressing low-probability regions.

CNN, convolutional neural network; GP, ganglionated plexus.

**Supplemental Figure 3b.** **Full probability distribution of CNN-predicted ganglionated-plexus (GP) sites on the left-atrial endocardial surface, postero-anterior view (display range ≥ 0.50).**

All 6 021 mapping points recorded during a single procedure are projected onto the patient-specific left-atrial mesh and color-coded by the model-predicted probability of GP tissue (continuous scale bar: 0.50 = dark blue to 1.00 = red). The dataset contains 128 electrophysiologic ally confirmed GP sites, all situated within areas of elevated probability. The network assigns probabilities ≥ 0.70 to 421 nodes (cyan–red clusters), delineating autonomic “hot-spots” along the mid-posterior wall, intercaval region and inferior vestibule. Points with intermediate probabilities (0.50–0.69) remain visible in darker blue, illustrating the full confidence gradient across the atrial shell, while white regions mark surface segments without electrogram acquisition. The widespread yet coherent distribution of both intermediate- and high-probability nodes highlights the classifier’s ability to capture diffuse as well as focal patterns of autonomic innervation.

CNN, convolutional neural network; GP, ganglionated plexus.

**Supplemental Figure 4.** **Training‑ (gold circles) and validation‑loss (orange squares) trajectories for the focal‑loss–optimized 1‑D CNN across an epoch axis extended to 26 iterations.**

Active learning ended at epoch 16, where early‑stopping restored the best weights; therefore, both curves remain flat from epoch 17 onward to match the 26‑epoch display used in prior figures. During training, loss decreased smoothly from ≈ 0.070 to ≈ 0.048, while validation loss exhibited transient spikes but settled to ≈ 0.055, indicating convergence without over‑fitting and justifying termination at epoch 16.

CNN, convolutional neural network.
